# Supplementary material for: Design of Christmas-Tree-like Microfluidic Gradient Generators for Cell-Based Studies
Source: MDPI journal article supplement (doi:10.3390/chemosensors11010002), 2022-12-20
Supplement: s1 [file s1]

Archive with 1 entries (1 files):
- chemosensors-2088391-supplementary.pdf
