# Supplementary material for: Design of Christmas-Tree-like Microfluidic Gradient Generators for Cell-Based Studies
Source: MDPI journal article supplement (doi:10.3390/chemosensors11010002), 2022-12-20
Supplement: s1 [file s1 › chemosensors-2088391-supplementary.pdf]

# Supplementary material: Mesh independence studies

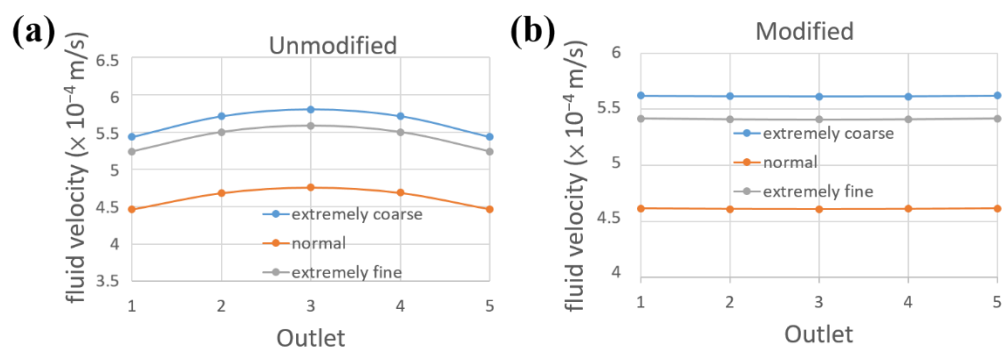

**Figure S1.** Simulation of fluid velocities for (a) unmodified and (b) modified, both with  $R_V/R_H = 5$ , devices under three different mesh settings (extremely fine, normal and extremely coarse).

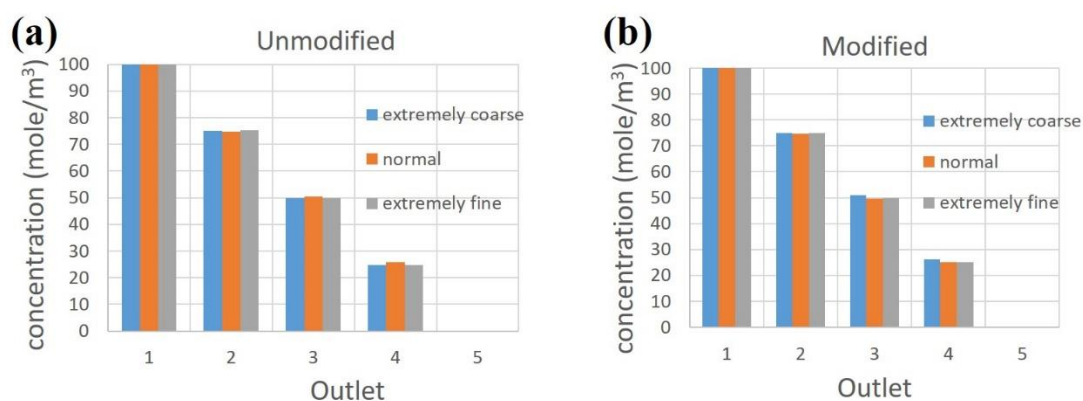

**Figure S2.** Simulation of concentrations for (a) unmodified and (b) modified, both with  $R_V/R_H = 5$ , devices under three different mesh settings (extremely fine, normal and extremely coarse).
